# Supplementary material for: Evidence of Long-Lasting Humoral and Cellular Immunity against SARS-CoV-2 Even in Elderly COVID-19 Convalescents Showing a Mild to Moderate Disease Progression
Source: MDPI journal article supplement (doi:10.3390/life11080805), 2021-08-09
Supplement: s1 [file s1]

## Supplementary Materials:

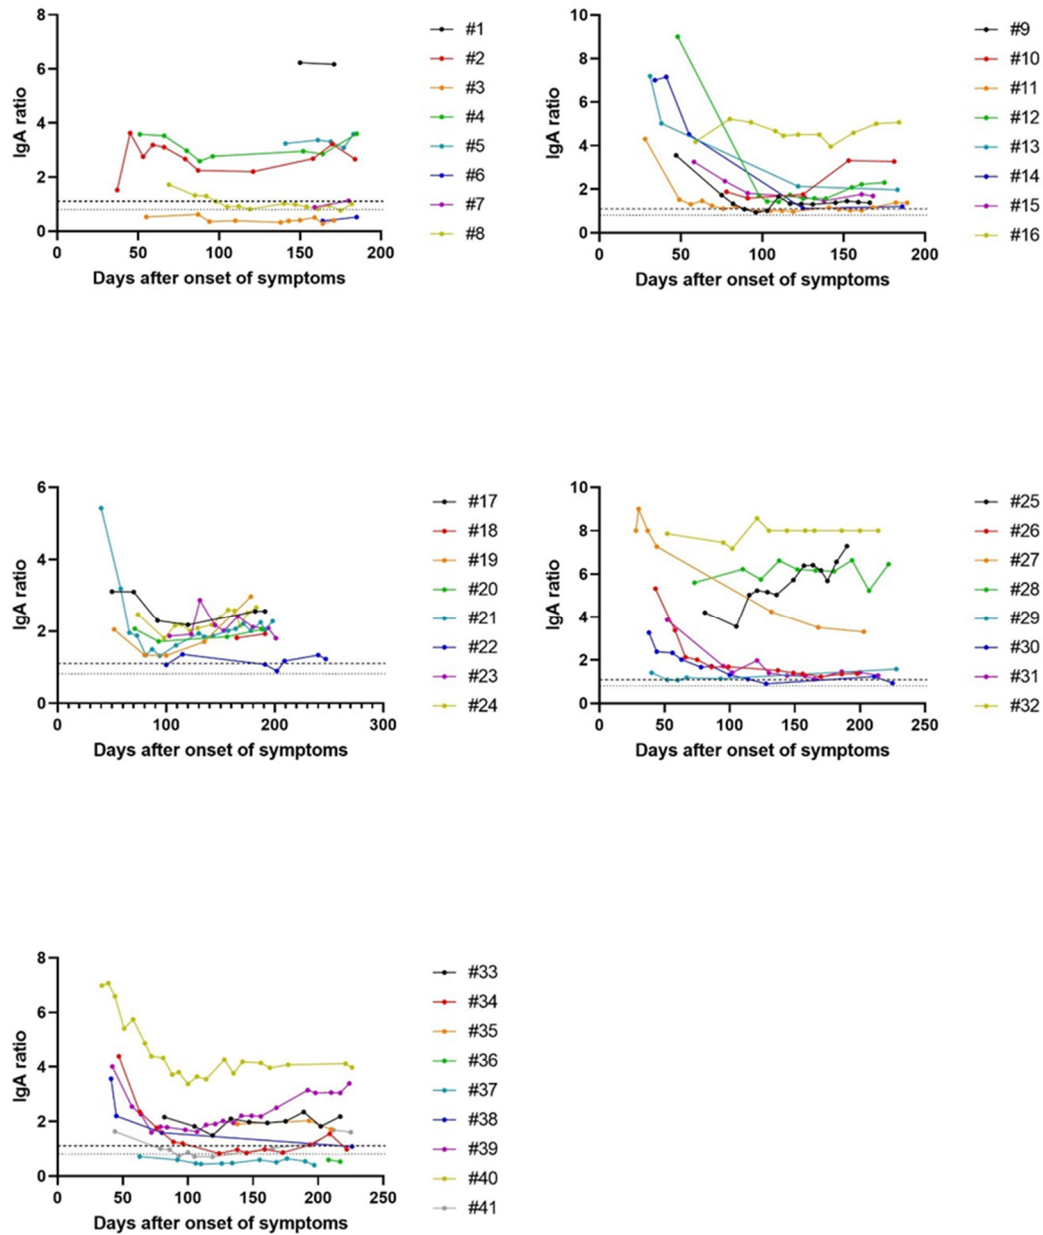

**Figure S1.** Persistence and decay of anti-SARS-CoV-2 IgA antibodies in COVID-19 convalescents (n = 41). Anti-SARS-CoV-2 IgA antibody expression of convalescents at the indicated days after onset of symptoms. Semi-quantitative ratios were determined using the ELISA-based Euroimmun assay. According to the manufacturer, values above the upper dashed line (ratio = 1.1) are considered as seropositive, and values below the lower dashed line (ratio = 0.8) are considered as seronegative. Values between the horizontal dashed lines were interpreted as equivocal-positive.

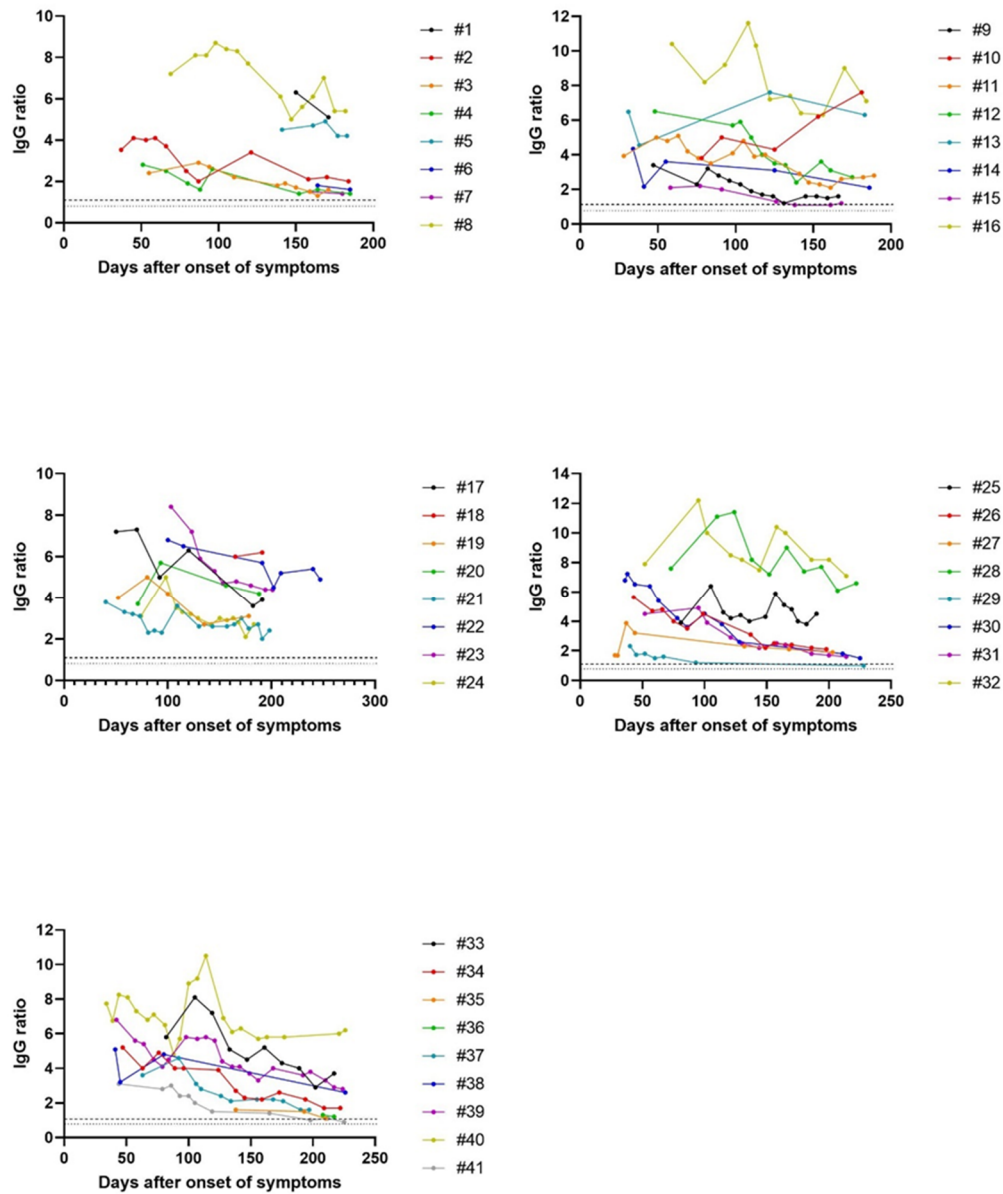

**Figure S2.** Persistence and decay of anti-SARS-CoV-2 IgG antibodies in COVID-19 convalescents (n = 41). Anti-SARS-CoV-2 IgG antibody expression of convalescents at the indicated days after onset of symptoms. Semi-quantitative ratios were determined using the ELISA-based Euroimmun assay. According to the manufacturer, values above the upper dashed line (ratio = 1.1) are considered as seropositive, and values below the lower dashed line (ratio = 0.8) are considered as seronegative. Values between the horizontal dashed lines were interpreted as equivocal-positive.

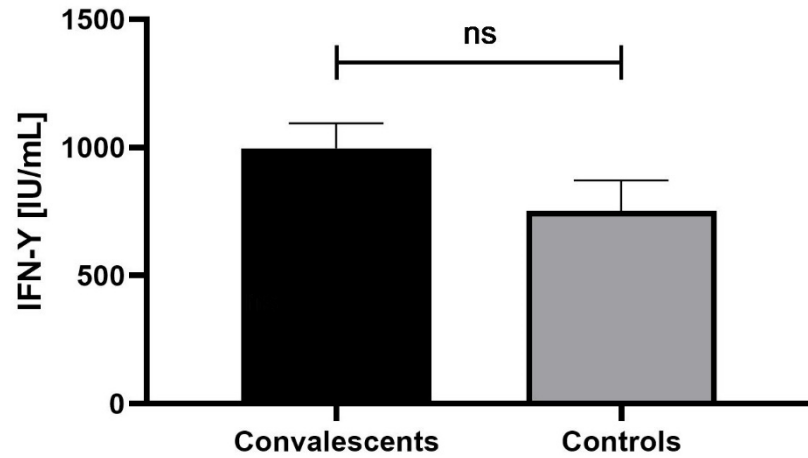

**Figure S3.** IFN- $\gamma$  release after stimulation of whole blood of convalescents (n = 41) and controls (n = 18) with LyoSpheres pellets. Cells in our study were stimulated in a parallel setup using LyoSpheres pellets containing a CD3 T-cell receptor agonist and a viral TLR 7/8 ligand (resiquimod or R848) for assay-validation and as a positive control. A comparatively high IFN- $\gamma$  release was detected because the QuantiFeron-assay was originally designed and optimized for the use of LyoSpheres. Nevertheless, no significant differences in the IFN- $\gamma$  secretion was detected after stimulation of the whole blood of COVID-19 convalescents and healthy controls. ns: not significant.
